# Supplementary material for: The role of individual audit partners for narrative disclosures
Source: Springer Nature journal article supplement (doi:10.1007/s11142-021-09634-4), 2021-09-10
Supplement: MOESM1 [file 11142_2021_9634_MOESM1_ESM.pdf]

# ONLINE APPENDIX

to

## The role of individual audit partners for narrative disclosures

This appendix provides figures and tables for the additional analyses mentioned in the paper. We only present the tables and figures for the main robustness tests. The tables and figures for further analyses based on minor adjustments are available upon request.

### List of Figures

|                                                                               |   |
|-------------------------------------------------------------------------------|---|
| A.1 Perplexity for different number of topics in LDA model training . . . . . | 5 |
|-------------------------------------------------------------------------------|---|

### List of Tables

|                                                                                                                       |    |
|-----------------------------------------------------------------------------------------------------------------------|----|
| A.1 Reporting requirements and size thresholds for limited liability firms according to German GAAP in 2012 . . . . . | 2  |
| A.2 Top five words for the topics identified by LDA . . . . .                                                         | 6  |
| A.3 Replication of Table 2 using a within year-industry paired sample . . . . .                                       | 8  |
| A.4 Audit partner changes specification . . . . .                                                                     | 9  |
| A.5 Falsification test . . . . .                                                                                      | 10 |
| A.6 Matched sample analyses . . . . .                                                                                 | 11 |
| A.7 Alternative similarity proxies . . . . .                                                                          | 13 |

## Institutional setting in Germany

### *General reporting requirements for limited liability firms*

In Germany, limited liability firms are required to disclose financial statements consisting of a balance sheet, a profit and loss statement, and notes. In addition to financial statements, firms must disclose a management report.<sup>1</sup> Publicly listed firms are additionally required to disclose a statement of changes in equity and a cash flow statement. Groups need to disclose all of the above statements on a consolidated basis and a group management report. Whereas German GAAP is generally applicable, capital-market-oriented firms have to follow International Financial Reporting Standards (IFRS) as endorsed by the EU for their consolidated financial statements.

---

**TABLE A.1**  
**Reporting requirements and size thresholds for limited liability firms**  
**according to German GAAP in 2012**

|                                                              | <b>Small firms</b>                                                                 | <b>Medium firms</b>                                                                  | <b>Large firms</b>                                                          |
|--------------------------------------------------------------|------------------------------------------------------------------------------------|--------------------------------------------------------------------------------------|-----------------------------------------------------------------------------|
| Size thresholds (at least two criteria need to be fulfilled) | $\leq 4.84$ Mio. € Total assets<br>$\leq 9.68$ Mio. € Sales<br>$\leq 50$ employees | $\leq 19.25$ Mio. € Total assets<br>$\leq 38.5$ Mio. € Sales<br>$\leq 250$ employees | $> 19.25$ Mio. € Total assets<br>$> 38.5$ Mio. € Sales<br>$> 250$ employees |
| Balance sheet                                                | Yes                                                                                | Yes                                                                                  | Yes                                                                         |
| Income statement                                             | No                                                                                 | Yes                                                                                  | Yes                                                                         |
| Notes                                                        | Yes                                                                                | Yes                                                                                  | Yes                                                                         |
| Management report                                            | No                                                                                 | Yes                                                                                  | Yes                                                                         |
| External audit                                               | No                                                                                 | Yes                                                                                  | Yes                                                                         |

---

This table presents the reporting requirements and size thresholds for limited liability firms according to German GAAP in 2012. Note that publicly listed firms are always classified as large firms.

---

Management reports and notes are generally highly comparable to the Management Discussion and Analysis (MD&A) and the footnotes in the United States. To comply with German GAAP, firms must discuss several topics in the management report, such as the economic situation

<sup>1</sup>If firms are classified as small by German Generally Accepted Accounting Principles (GAAP), they neither need to disclose a management report nor to have their financial statements audited (see Table A.1). Therefore, we exclude these client firms from our analysis. Note that while the number-of-employees threshold was fixed throughout our sample period, the other two thresholds were slightly inflation-adjusted. These thresholds are very similar to the currently effective thresholds in German GAAP.

of the firm, an economic outlook, and material risks and opportunities. Furthermore, firms need to report on their research and development, financial risks, the internal control and risk management system, and corporate governance topics (Sec. 289, 315 German GAAP). The notes contain supplementary information on items in the financial statements—for example, on the principles underlying the recognition and measurement of assets and liabilities, or detailed information on long-term assets and liabilities (Sec. 284, 285, 313, 314 German GAAP).

#### *Audit requirements*

According to Sec. 316 in German GAAP, (consolidated) financial statements of medium and large limited liability firms are subject to mandatory audits.<sup>2</sup> Auditors need to provide an auditor’s report and issue an audit opinion, which become part of the firm’s financial statements. Furthermore, unlike in the United States, German GAAP also requires an audit of management reports with reasonable assurance (Sec. 317 (2) German GAAP). The financial statements and the management report must be in line with German GAAP, and auditors conducting the audit must follow the International Standards of Auditing (Sec. 317 (5) German GAAP). Additionally, management reports need to accord with the financial statements and the impressions the auditor gained during the audit process. Moreover, the management report itself must provide a true and fair view. Because management reports consist of forward-looking information, German GAAP requires an audit of their plausibility.

To provide guidance for auditors, the German Institute of Chartered Auditors (IDW) issued an auditing standard for management reports in 2009 (IDW PS 350).<sup>3</sup> The standard combines the audit requirements of German GAAP with clarifications regarding the scope, process, and procedures of audits. For example, IDW PS 350.17 asks auditors to evaluate client firms’ internal financial planning systems when judging the validity of forecasts, and IDW PS 350.18 requires that auditors consider the general economic development or that of industry peers when evaluating the information in client firms’ management reports.

---

<sup>2</sup>Other than EU Directive 2013/34/EU, the German legislation requires an audit with reasonable assurance for management reports.

<sup>3</sup>IDW PS 201.29 states that auditors can only deviate from IDW auditing standards in justified cases, which makes their application de facto mandatory. Additionally, a revised version of the standard, IDW PS 350 n.F., came into effect in 2018.

### *Specifics of auditing narrative disclosures*

The audit of narrative disclosures is characterized as follows. First, their audit generally follows the audit of financial statements. Auditors can thus audit narrative disclosures in the context of the information gained from the financial statement audit (Cohen et al. 2008). Second, even though German GAAP has clear requirements on the subjects of management reports, the requirements remain vague in order to allow the disclosure of tailored, firm-specific information (Baetge et al. 1989). Hence, client firms have a high degree of discretion on what to report and how to phrase it, which makes the audit of narrative disclosures challenging (Kajüter et al. 2017). Third, the audit of forward-looking statements in management reports requires the verification of the validity and plausibility of the assumptions underlying the forecasts, which might be challenging because auditors are used to auditing historical and quantitative financial statement information (Gibbins and Pomeroy 2007).

---

**FIGURE A.1**  
Perplexity for different number of topics in LDA model training

**Panel A: Management report**

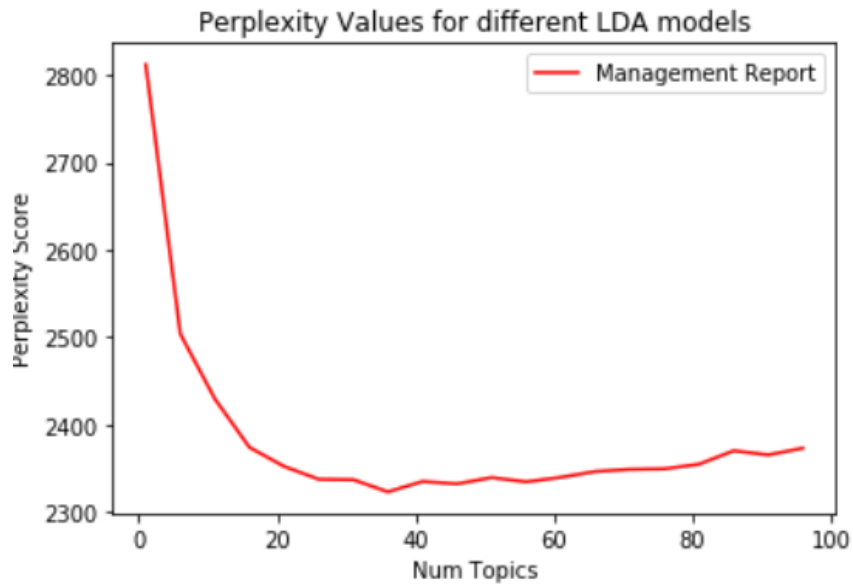

**Panel B: Notes**

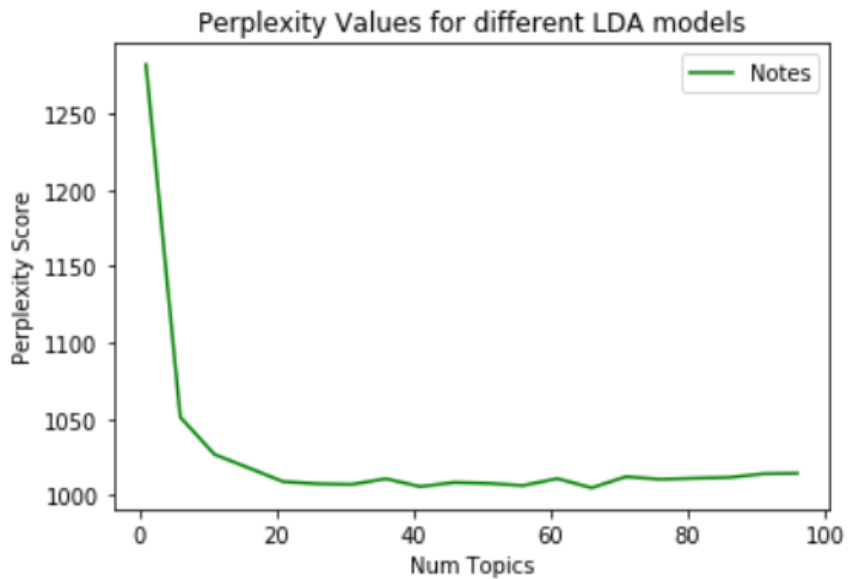

---

This figure shows different perplexity values for a ten percent holdout sample for different LDA models that are based on a different number of predefined topics in the management reports (Panel A) and the notes (Panel B).

---

---

**TABLE A.2**  
**Top five words for the topics identified by LDA**

**Panel A: Management report**

| <u>Topic number</u> | <u>Top five words</u>                                                              |
|---------------------|------------------------------------------------------------------------------------|
| 1                   | Order inflow, Maschine, Manufacturing, Research, Unfilled orders                   |
| 2                   | Risk management, Internal, Regularly, Risk, Control                                |
| 3                   | USA, China, India, Asia, Global                                                    |
| 4                   | Sustainable, Strategy, Safe, Challenge, Success                                    |
| 5                   | Clinic, Medicine, Hospital, Patient, Inpatient                                     |
| 6                   | Retail, Trade, Merchant, Assortment, Wholesale                                     |
| 7                   | Service, Media, Service provider, Software, IT                                     |
| 8                   | Supervisory board, Stock, Remuneration, Member, General meeting                    |
| 9                   | Financial instrument, Risk report, Financial, Within, Risk                         |
| 10                  | Law, Human, Supply, Establishment, Insurance                                       |
| 11                  | Construction, Public, Building industry, House building, Main construction work    |
| 12                  | Return, However, Property, Competition, Cost                                       |
| 13                  | Market, Corporation, Net, Catering trade, Food                                     |
| 14                  | Branch, City, Limited liability, Public, Service provider                          |
| 15                  | ISO, Firm, Personnel, Necessary, Supplier                                          |
| 16                  | Solar, Energy, Electricity, Renewable, Gas                                         |
| 17                  | Version, Visit, Setcustomvariable, PAQ, Script                                     |
| 18                  | Technology, System, Group, USA, Distribution                                       |
| 19                  | Automotive, Vehicle, BMW, Automotive industry, Passenger car                       |
| 20                  | GDP, Decrease, Cyclical, Second, Went                                              |
| 21                  | Research, Study, Treatment, Phase, Program                                         |
| 22                  | Holding, Group, Group company, Consolidated Accounts, Hotel                        |
| 23                  | Mr., January, April, Supervisory board, March                                      |
| 24                  | Waste disposal, Spanish, Web, Recycling, Waste                                     |
| 25                  | Price, Ressource, Sales, Ton, Issuance                                             |
| 26                  | Transaction, Presentation, See, Financial position, Total output                   |
| 27                  | Agriculture, Milk, Fiscal-year, Price, EU                                          |
| 28                  | Property, Apartment, Munich, Object, Rent                                          |
| 29                  | Provision, Result, Reporting date, Decrease, Contain                               |
| 30                  | Cooperative, EG (short for registered cooperative), Member, Supervisory board, PPE |

(continued)

## Panel B: Notes

| Topic number | Top five words                                                                                        |
|--------------|-------------------------------------------------------------------------------------------------------|
| 1            | Million, Investment, Associated, Subsidiary, Equitymethod                                             |
| 2            | Holding, Limited, Incorporated, Investment, Subsidiary                                                |
| 3            | Goodwill difference amount, Capital, Capital consolidation, First-time, Difference                    |
| 4            | Munich, Estate, Construction, Property, Us                                                            |
| 5            | Low, Linear, Value, Ordinary, Operational                                                             |
| 6            | Recognized, Value, Fair, Impairment, Affecting net income                                             |
| 7            | Stock corporation, Management board, Supervisory board, Stock, Capital stock                          |
| 8            | Extraordinary item, Investment committee, City, Close a position, Form a position                     |
| 9            | Limited liability, Principle, Stuttgart, First consolidation, Group company                           |
| 10           | Financial instrument, Derivative, Market value, Converted, Abroad                                     |
| 11           | Euro, Insofar, Ordinary, Balance sheet, As far as                                                     |
| 12           | Stock corporation, Group, Group (German), Subsidiary, Munich                                          |
| 13           | Balance sheet, Member, EG (short for registered cooperative), Valuation method, Item                  |
| 14           | Annual financial statements, Balance sheet, Number, Rule, Mr.                                         |
| 15           | Person, Liable, Proprietor, Complementary, Administration                                             |
| 16           | IFRS, Other, IAS, Standard, Apply                                                                     |
| 17           | Amount repayable, Time to maturity, BILMOG (Law act), Sentence, EGHGB (Law act)                       |
| 18           | Subsidiary, Goodwill difference amount, Capital consolidation, Basis of consolidation, Parent company |
| 19           | Capitalize, Goodwill, Following, Firm, Business                                                       |
| 20           | Firm, Subject, Output, Include, Position                                                              |

This table shows the top five words (English translation) for the topics identified by the LDA algorithm for the management reports (Panel A) and the notes (Panel B).

**TABLE A.3**  
Replication of Table 2 using a within year-industry paired sample

**Panel A: Management report**

|                                      | <u>WORDING_SIM<sub>i,j</sub></u> | <u>CONTENT_SIM<sub>i,j</sub></u> | <u>STRUCTURE_SIM<sub>i,j</sub></u> |
|--------------------------------------|----------------------------------|----------------------------------|------------------------------------|
| SAME_AUDITOR(Partner) <sub>i,j</sub> | 33.580***<br>(4.451)             | 17.634**<br>(2.166)              | 43.735***<br>(5.436)               |
| Controls                             | Yes                              | Yes                              | Yes                                |
| Industry FE                          | Yes                              | Yes                              | Yes                                |
| Year FE                              | Yes                              | Yes                              | Yes                                |
| Adjusted $R^2$                       | 0.058                            | 0.234                            | 0.013                              |
| Observations                         | 345,801                          | 337,379                          | 345,801                            |

**Panel B: Notes**

|                                      | <u>WORDING_SIM<sub>i,j</sub></u> | <u>CONTENT_SIM<sub>i,j</sub></u> | <u>STRUCTURE_SIM<sub>i,j</sub></u> |
|--------------------------------------|----------------------------------|----------------------------------|------------------------------------|
| SAME_AUDITOR(Partner) <sub>i,j</sub> | 43.156***<br>(10.217)            | 22.253***<br>(5.498)             | 72.678***<br>(6.658)               |
| Controls                             | Yes                              | Yes                              | Yes                                |
| Industry FE                          | Yes                              | Yes                              | Yes                                |
| Year FE                              | Yes                              | Yes                              | Yes                                |
| Adjusted $R^2$                       | 0.147                            | 0.689                            | 0.016                              |
| Observations                         | 327,992                          | 326,255                          | 324,745                            |

This table presents the relation between sharing an audit partner and textual similarity of narrative disclosures for a within industry-year paired sample. Panel A (Panel B) presents the results for management reports (notes). In Column 1, the dependent variable  $WORDING\_SIM_{i,j}$  is the cosine of the angle between the IDF-weighted term frequency vectors of management reports or notes  $i$  and  $j$ , multiplied by 100. In Column 2, the dependent variable  $CONTENT\_SIM_{i,j}$  is the cosine of the angle between the topic vectors of management reports or notes  $i$  and  $j$ , multiplied by 100. In Column 3, the dependent variable  $STRUCTURE\_SIM_{i,j}$  is the cosine of the angle between the headline vectors, which contain the exact headings of management reports or notes  $i$  and  $j$ , multiplied by 100. All three dependent variables are log-transformed and multiplied by 100.  $SAME\_AUDITOR(Partner)_{i,j}$  is an indicator variable that equals one if client firms  $i$  and  $j$  share the same audit partner in a year, and zero otherwise. In all three regressions, we use the same control variables as in our main model except  $SAME\_INDUSTRY_{i,j}$ , and include client firm  $i$ -by year and client firm  $j$ -by year fixed effects. We cluster standard errors on client firm  $i$ 's and  $j$ 's audit partners. Differences in the pre-processing of our algorithms lead to different sample sizes for  $WORDING\_SIM_{i,j}$ ,  $CONTENT\_SIM_{i,j}$ , and  $STRUCTURE\_SIM_{i,j}$ . Robust t-statistics are reported in parentheses. \*, \*\*, and \*\*\* denote statistical significance at the 0.10, 0.05, and 0.01 levels (two-tailed tests), respectively.



**TABLE A.4**  
**Audit partner changes specification**

**Panel A: Management report**

|                                      | <u>WORDING_SIM<sub>i,j</sub></u> | <u>CONTENT_SIM<sub>i,j</sub></u> | <u>STRUCTURE_SIM<sub>i,j</sub></u> |
|--------------------------------------|----------------------------------|----------------------------------|------------------------------------|
| SAME_AUDITOR(Partner) <sub>i,j</sub> | 1.806*<br>(1.908)                | −0.517<br>(−0.402)               | 13.962***<br>(2.833)               |
| Controls                             | Yes                              | Yes                              | Yes                                |
| Client firm-pair <sub>i,j</sub> FE   | Yes                              | Yes                              | Yes                                |
| Client firm <sub>i</sub> × Year FE   | Yes                              | Yes                              | Yes                                |
| Client firm <sub>j</sub> × Year FE   | Yes                              | Yes                              | Yes                                |
| Adjusted $R^2$                       | 0.872                            | 0.872                            | 0.441                              |
| Observations                         | 2,962,180                        | 2,848,510                        | 2,962,180                          |

**Panel B: Notes**

|                                      | <u>WORDING_SIM<sub>i,j</sub></u> | <u>CONTENT_SIM<sub>i,j</sub></u> | <u>STRUCTURE_SIM<sub>i,j</sub></u> |
|--------------------------------------|----------------------------------|----------------------------------|------------------------------------|
| SAME_AUDITOR(Partner) <sub>i,j</sub> | 5.988***<br>(4.906)              | 6.752***<br>(2.931)              | 24.331***<br>(3.360)               |
| Controls                             | Yes                              | Yes                              | Yes                                |
| Client firm-pair <sub>i,j</sub> FE   | Yes                              | Yes                              | Yes                                |
| Client firm <sub>i</sub> × Year FE   | Yes                              | Yes                              | Yes                                |
| Client firm <sub>j</sub> × Year FE   | Yes                              | Yes                              | Yes                                |
| Adjusted $R^2$                       | 0.929                            | 0.948                            | 0.502                              |
| Observations                         | 2,803,177                        | 2,770,636                        | 2,766,907                          |

This table presents the relation between sharing an audit partner and textual similarity of narrative disclosures with the inclusion of client-firm pair fixed effects. Panel A (Panel B) presents the results for management reports (notes). In Column 1, the dependent variable  $WORDING\_SIM_{i,j}$  is the cosine of the angle between the IDF-weighted term frequency vectors of management reports or notes  $i$  and  $j$ , multiplied by 100. In Column 2, the dependent variable  $CONTENT\_SIM_{i,j}$  is the cosine of the angle between the topic vectors of management reports or notes  $i$  and  $j$ , multiplied by 100. In Column 3, the dependent variable  $STRUCTURE\_SIM_{i,j}$  is the cosine of the angle between the headline vectors, which contain the exact headings of management reports or notes  $i$  and  $j$ , multiplied by 100. All three dependent variables are log-transformed and multiplied by 100.  $SAME\_AUDITOR(Partner)_{i,j}$  is an indicator variable that equals one if client firms  $i$  and  $j$  share the same audit partner in a year, and zero otherwise. In all three regressions, we use the same control variables as in our main model, control additionally for audit office and audit firm changes, and include client firm-pair  $i,j$ , client firm  $i$ -by year, and client firm  $j$ -by year fixed effects. We cluster standard errors on client firm  $i$ 's and  $j$ 's audit partners. Differences in the pre-processing of our algorithms lead to different sample sizes for  $WORDING\_SIM_{i,j}$ ,  $CONTENT\_SIM_{i,j}$ , and  $STRUCTURE\_SIM_{i,j}$ . Robust t-statistics are reported in parentheses. \*, \*\*, and \*\*\* denote statistical significance at the 0.10, 0.05, and 0.01 levels (two-tailed tests), respectively.

**TABLE A.5**  
**Falsification test**

|                                             | WEBSITE_SIM <sub><i>i,j</i></sub> | WORDING_SIM <sub><i>i,j</i></sub> |
|---------------------------------------------|-----------------------------------|-----------------------------------|
| SAME_AUDITOR(Partner) <sub><i>i,j</i></sub> | 3.571<br>(1.322)                  | 19.655***<br>(4.044)              |
| Controls                                    | Yes                               | Yes                               |
| Client firm <sub><i>i</i></sub> × Year FE   | Yes                               | Yes                               |
| Client firm <sub><i>j</i></sub> × Year FE   | Yes                               | Yes                               |
| Adjusted $R^2$                              | 0.718                             | 0.567                             |
| Observations                                | 284,683                           | 356,610                           |

This table presents the relation between sharing an audit partner and textual similarity of clients' website text. In Column 1, the dependent variable  $WEBSITE\_SIM_{i,j}$  is the cosine of the angle between the IDF-weighted term frequency vectors of the website text of client firms  $i$  and  $j$ , multiplied by 100. In Column 2, the dependent variable  $WORDING\_SIM_{i,j}$  is the cosine of the angle between the IDF-weighted term frequency vectors of management reports  $i$  and  $j$ , multiplied by 100. Both dependent variables are log-transformed and multiplied by 100.  $SAME\_AUDITOR(Partner)_{i,j}$  is an indicator variable that equals one if client firms  $i$  and  $j$  share the same audit partner in a year, and zero otherwise. In both regressions, we use the same control variables as in our main model and include client firm  $i$ -by year and client firm  $j$ -by year fixed effects. We cluster standard errors on client firm  $i$ 's and  $j$ 's audit partners. Robust t-statistics are reported in parentheses. \*, \*\*, and \*\*\* denote statistical significance at the 0.10, 0.05, and 0.01 levels (two-tailed tests), respectively.

**TABLE A.6**  
Matched sample analyses

**Panel A: Management report with client firm-by year FE**

|                                      | <u>WORDING_SIM<sub>i,j</sub></u> | <u>CONTENT_SIM<sub>i,j</sub></u> | <u>STRUCTURE_SIM<sub>i,j</sub></u> |
|--------------------------------------|----------------------------------|----------------------------------|------------------------------------|
| SAME_AUDITOR(Partner) <sub>i,j</sub> | 29.182***<br>(5.171)             | 27.230***<br>(2.620)             | 27.568*<br>(1.772)                 |
| Controls                             | Yes                              | Yes                              | Yes                                |
| Client firm <sub>i</sub> × Year FE   | Yes                              | Yes                              | Yes                                |
| Client firm <sub>j</sub> × Year FE   | Yes                              | Yes                              | Yes                                |
| Adjusted $R^2$                       | 0.732                            | 0.556                            | 0.221                              |
| Observations                         | 2,879                            | 2,762                            | 2,879                              |

**Panel B: Notes with client firm-by year FE**

|                                      | <u>WORDING_SIM<sub>i,j</sub></u> | <u>CONTENT_SIM<sub>i,j</sub></u> | <u>STRUCTURE_SIM<sub>i,j</sub></u> |
|--------------------------------------|----------------------------------|----------------------------------|------------------------------------|
| SAME_AUDITOR(Partner) <sub>i,j</sub> | 37.229***<br>(7.487)             | 30.785***<br>(3.830)             | 52.386***<br>(3.309)               |
| Controls                             | Yes                              | Yes                              | Yes                                |
| Client firm <sub>i</sub> × Year FE   | Yes                              | Yes                              | Yes                                |
| Client firm <sub>j</sub> × Year FE   | Yes                              | Yes                              | Yes                                |
| Adjusted $R^2$                       | 0.790                            | 0.759                            | 0.412                              |
| Observations                         | 2,701                            | 2,590                            | 2,705                              |

(continued)

**Panel C: Management report with client firm FE**

|                                      | WORDING_SIM <sub>i,j</sub> | CONTENT_SIM <sub>i,j</sub> | STRUCTURE_SIM <sub>i,j</sub> |
|--------------------------------------|----------------------------|----------------------------|------------------------------|
| SAME_AUDITOR(Partner) <sub>i,j</sub> | 24.414***<br>(4.932)       | 24.395***<br>(3.352)       | 26.141***<br>(2.724)         |
| Controls                             | Yes                        | Yes                        | Yes                          |
| Client firm <sub>i</sub> FE          | Yes                        | Yes                        | Yes                          |
| Client firm <sub>j</sub> FE          | Yes                        | Yes                        | Yes                          |
| Adjusted $R^2$                       | 0.740                      | 0.601                      | 0.328                        |
| Observations                         | 5,409                      | 5,259                      | 5,409                        |

**Panel D: Notes with client firm FE**

|                                      | WORDING_SIM <sub>i,j</sub> | CONTENT_SIM <sub>i,j</sub> | STRUCTURE_SIM <sub>i,j</sub> |
|--------------------------------------|----------------------------|----------------------------|------------------------------|
| SAME_AUDITOR(Partner) <sub>i,j</sub> | 38.427***<br>(9.644)       | 31.025***<br>(4.353)       | 68.769***<br>(5.406)         |
| Controls                             | Yes                        | Yes                        | Yes                          |
| Client firm <sub>i</sub> FE          | Yes                        | Yes                        | Yes                          |
| Client firm <sub>j</sub> FE          | Yes                        | Yes                        | Yes                          |
| Adjusted $R^2$                       | 0.750                      | 0.805                      | 0.433                        |
| Observations                         | 5,146                      | 5,038                      | 5,101                        |

This table presents the relation between sharing an audit partner and textual similarity of narratives disclosures for a matched sample, where approximately 50 percent of the client firm-pairs have the same audit partner. The dependent variable  $WORDING\_SIM_{i,j}$  is the cosine of the angle between the IDF-weighted term frequency vectors of management reports or notes  $i$  and  $j$ , multiplied by 100.  $CONTENT\_SIM_{i,j}$  is the cosine of the angle between the topic vectors of management reports or notes  $i$  and  $j$ , multiplied by 100.  $STRUCTURE\_SIM_{i,j}$  is the cosine of the angle between the headline vectors, which contain the exact headings of management reports or notes  $i$  and  $j$ , multiplied by 100. All three dependent variables are log-transformed and multiplied by 100.  $SAME\_AUDITOR(Partner)_{i,j}$  is an indicator variable that equals one if client firms  $i$  and  $j$  share the same audit partner in a year, and zero otherwise. In both regressions, we use the same control variables as in our main model. Panels A and B include client firm  $i$ -by year and client firm  $j$ -by year fixed effects. Because this fixed effect structure leads to many singleton observations, we also report a specification with client firm  $i$  and client firm  $j$  fixed effects (Panels C and D). We cluster standard errors on client firm  $i$ 's and  $j$ 's audit partners. Differences in the pre-processing of our algorithms lead to different sample sizes for  $WORDING\_SIM_{i,j}$ ,  $CONTENT\_SIM_{i,j}$ , and  $STRUCTURE\_SIM_{i,j}$ . Robust t-statistics are reported in parentheses. \*, \*\*, and \*\*\* denote statistical significance at the 0.10, 0.05, and 0.01 levels (two-tailed tests), respectively.

**TABLE A.7**  
Alternative similarity proxies

**Panel A: Management report**

|                                      | <u>WORDING_SIM_WCF<sub>i,j</sub></u> | <u>CONTENT_SIM_WEMBED<sub>i,j</sub></u> | <u>STRUCTURE_SIM_DEPTH<sub>i,j</sub></u> |
|--------------------------------------|--------------------------------------|-----------------------------------------|------------------------------------------|
| SAME_AUDITOR(Partner) <sub>i,j</sub> | 26.559***<br>(7.707)                 | 0.066***<br>(2.840)                     | 0.417***<br>(2.723)                      |
| Controls                             | Yes                                  | Yes                                     | Yes                                      |
| Client firm <sub>i</sub> × Year FE   | Yes                                  | Yes                                     | Yes                                      |
| Client firm <sub>j</sub> × Year FE   | Yes                                  | Yes                                     | Yes                                      |
| Adjusted $R^2$                       | 0.581                                | 0.700                                   | 0.942                                    |
| Observations                         | 2,874,196                            | 3,248,109                               | 3,165,993                                |

**Panel B: Notes**

|                                      | <u>WORDING_SIM_WCF<sub>i,j</sub></u> | <u>CONTENT_SIM_WEMBED<sub>i,j</sub></u> | <u>STRUCTURE_SIM_DEPTH<sub>i,j</sub></u> |
|--------------------------------------|--------------------------------------|-----------------------------------------|------------------------------------------|
| SAME_AUDITOR(Partner) <sub>i,j</sub> | 60.725***<br>(11.797)                | 0.255***<br>(6.776)                     | 0.150**<br>(2.078)                       |
| Controls                             | Yes                                  | Yes                                     | Yes                                      |
| Client firm <sub>i</sub> × Year FE   | Yes                                  | Yes                                     | Yes                                      |
| Client firm <sub>j</sub> × Year FE   | Yes                                  | Yes                                     | Yes                                      |
| Adjusted $R^2$                       | 0.859                                | 0.900                                   | 0.949                                    |
| Observations                         | 2,101,086                            | 3,112,756                               | 3,093,740                                |

This table presents the analysis of the effect of client firms  $i$  and  $j$  sharing the same audit partner on wording, content, and structure similarity, respectively, when using an alternative proxy in each dimension. Panel A (Panel B) presents the results for management reports (notes). In Column 1, the dependent variable  $WORDING\_SIM\_WCF_{i,j}$  is the percentage of text that appears in both management reports or notes  $i$  and  $j$  measured by the text re-use detection software WCopyFind. In Column 2, the dependent variable  $CONTENT\_SIM\_WEMBED_{i,j}$  is the cosine of the angle between the mean word vectors of management reports or notes  $i$  and  $j$ , multiplied by 100. In Column 3, the dependent variable  $STRUCTURE\_SIM\_DEPTH_{i,j}$  is the absolute difference in the number of headlines per 100 words of management reports or notes  $i$  and  $j$ , multiplied by minus one and converted to the positive with a translation by the minimum value. All three dependent variables are log-transformed and multiplied by 100.  $SAME\_AUDITOR(Partner)_{i,j}$  is an indicator variable that equals one if client firms  $i$  and  $j$  share the same audit partner in a year, and zero otherwise. In all three regressions, we use the same control variables as in our main model and include client firm  $i$ -by year and client firm  $j$ -by year fixed effects. We cluster standard errors on client firm  $i$ 's and  $j$ 's audit partners. Differences in the pre-processing of our algorithms lead to different sample sizes for  $WORDING\_SIM\_WCF_{i,j}$ ,  $CONTENT\_SIM\_WEMBED_{i,j}$ , and  $STRUCTURE\_SIM\_DEPTH_{i,j}$ . Robust t-statistics are reported in parentheses. \*, \*\*, and \*\*\* denote statistical significance at the 0.10, 0.05, and 0.01 levels (two-tailed tests), respectively.

## References

- Baetge, J., Fischer, T. R. and Paskert, D. 1989. *Der Lagebericht - Aufstellung, Prüfung und Offenlegung*. Stuttgart: Schäffer.
- Cohen, J. R., Gaynor, L. M., Holder-Webb, L. L. and Montague, N. 2008. Management's discussion and analysis: Implications for audit practice and research. *Current Issues in Auditing* 2: A26–A35.
- Gibbins, M. and Pomeroy, B. 2007. Reflections on continuous reporting and auditing. *Accounting Perspectives* 6: 291–304.
- Kajüter, P., Nienhaus, M. and Nienaber, M. 2017. Prüfung des Lageberichts - Empirische Befunde einer explorativen Studie. *WPg* 70: 801–809.
